# Supplementary material for: Co-assembly and luminescence tuning of hybrids with task-specified ionic liquid encapsulating and linking lanthanide-polyoxometalates and complexes
Source: Royal Society of Chemistry journal article supplement (doi:10.1039/c4pp00125g), 2014-07-21
Supplement: c4pp00125g1.pdf [file c4pp00125g1.pdf]

## **Supporting information**

### **Co-assembly and luminescence tuning of hybrids with task-specified ionic liquid encapsulating and linking lanthanide-polyoxometalates and complexes**

Bing Yan\*, Jing Cuan

Department of Chemistry, Tongji University, Siping Road 1239, Shanghai 200092, China

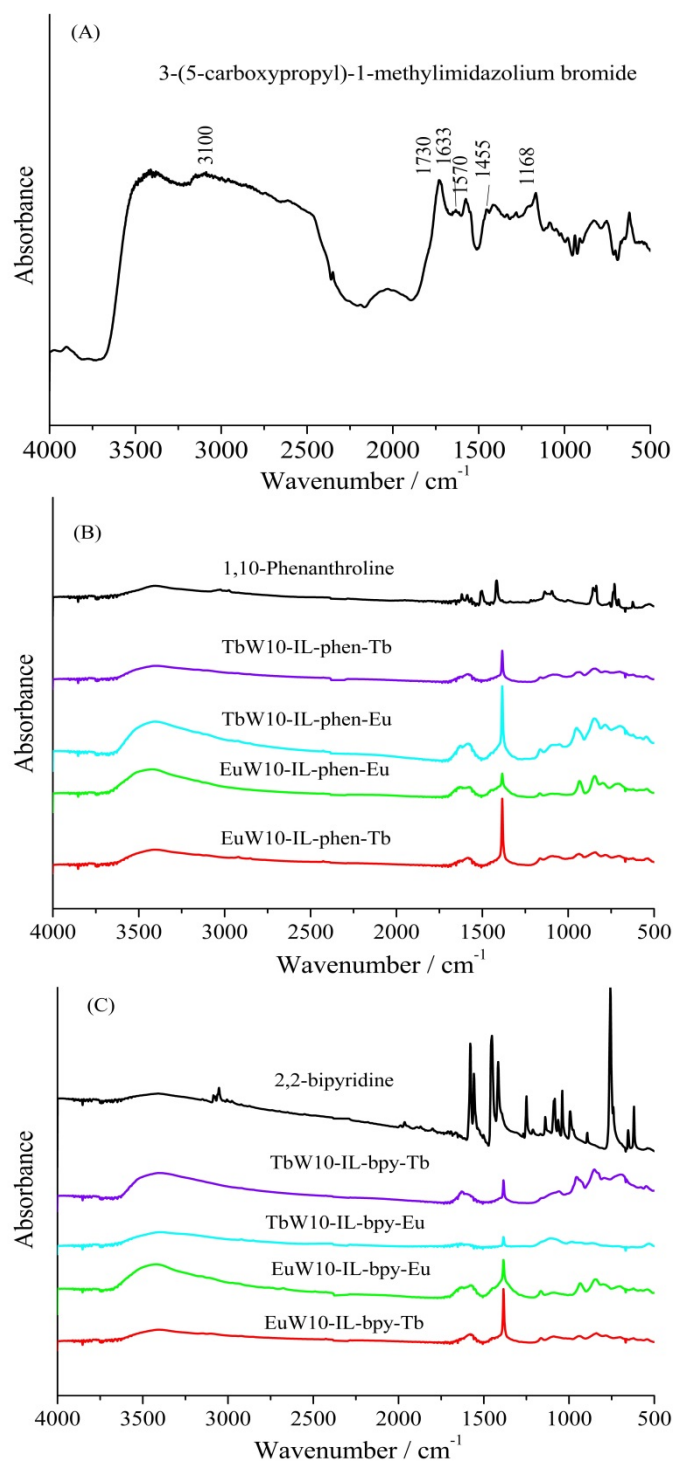

**Fig. S1** The FTIR spectra of task-specified ionic liquid  $\text{IM}^+\text{Br}^-$ (A), four 1,10-phenanthroline hybrids(B), four 2, 2'-bipyridine hybrids(C).

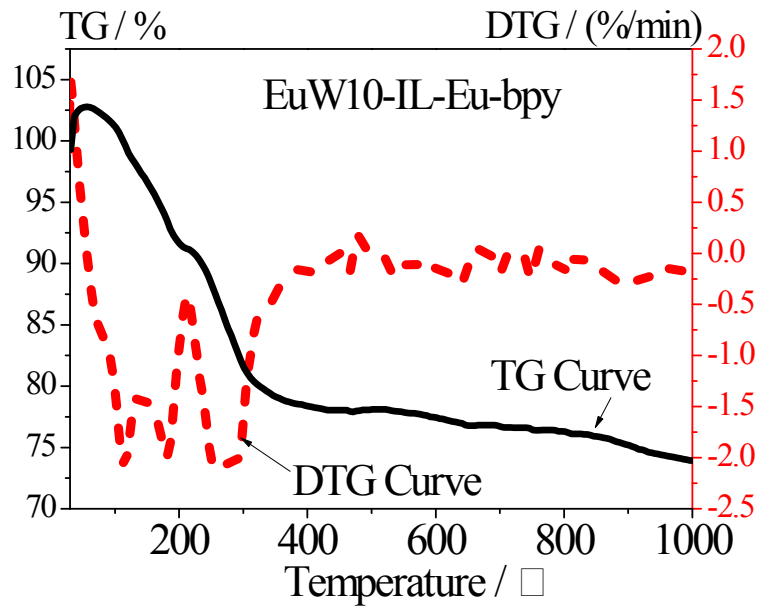

(a)

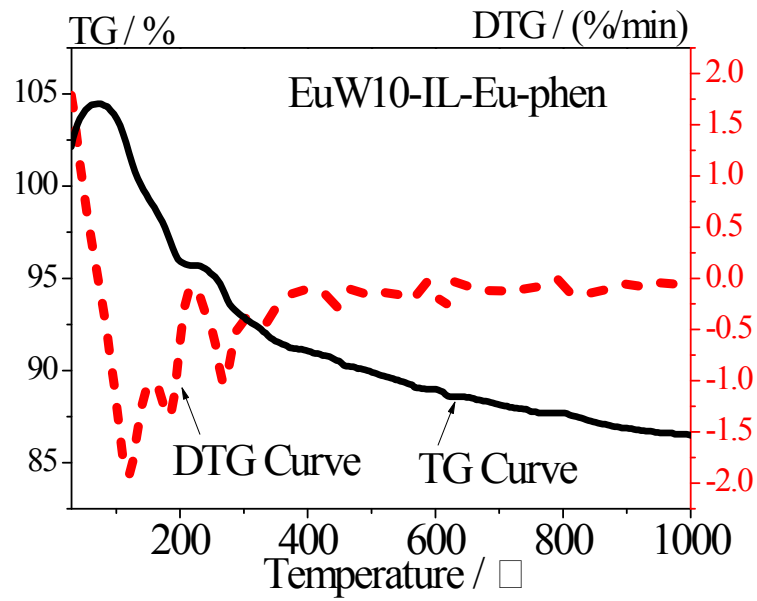

(b)

**Fig. S2** Thermal gravimetric curves of EuW10-IL-Eu-bpy(a) and EuW10-IL-Eu-phen (b) hybrids

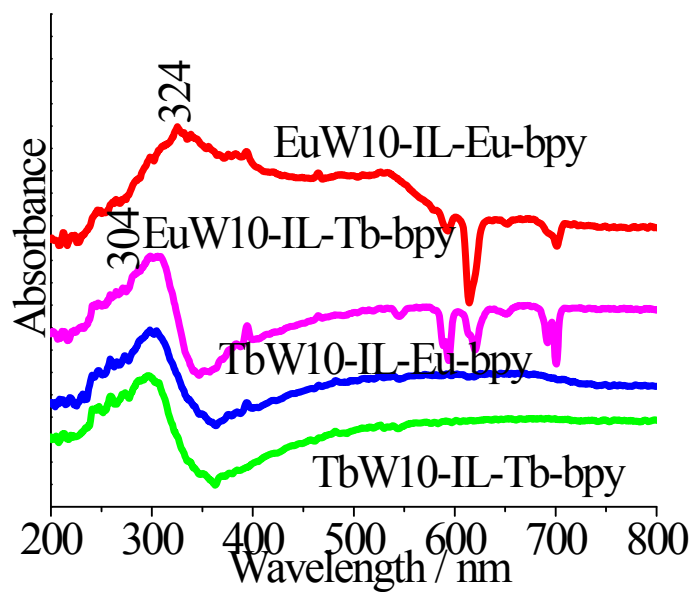

(a)

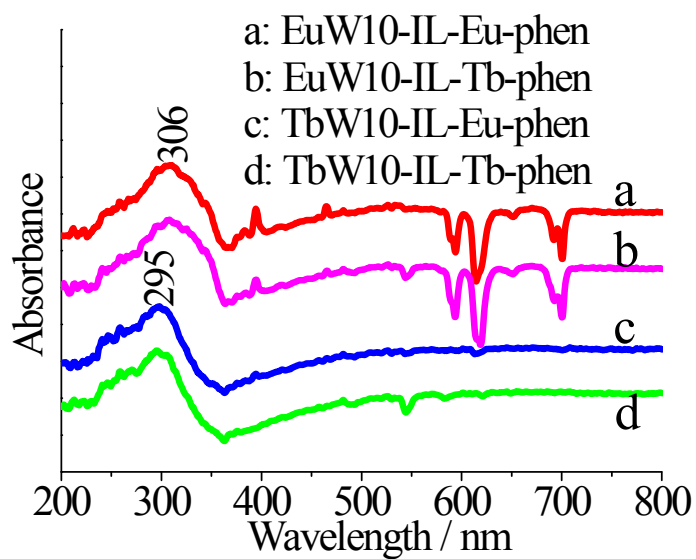

(b)

**Fig. S3** The UV-vis diffuse reflection absorption spectra of all hybrids.

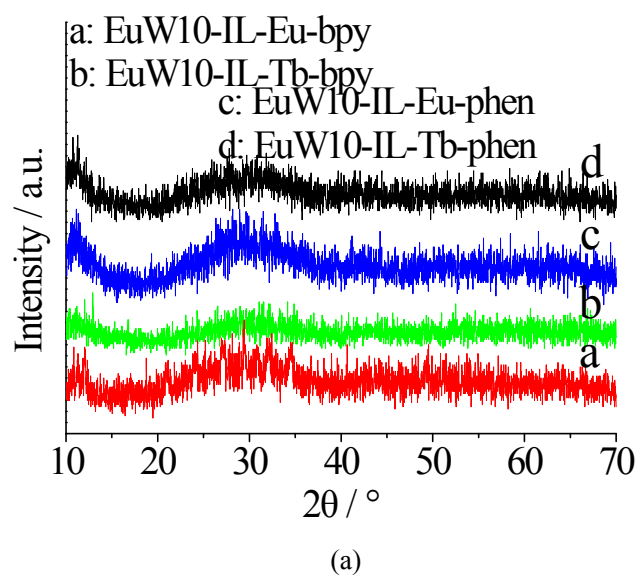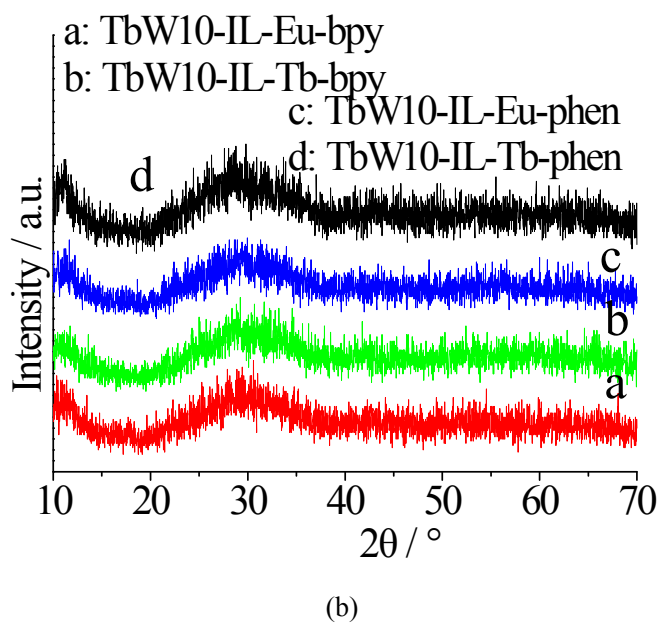

**Fig. S4** The XRD patterns of europium polyoxometalates hybrids (a) and terbium polyoxometalates hybrids (b).
